# Supplementary material for: Simultaneous amorphous silica and phosphorus recovery from rice husk poultry litter ash
Source: Royal Society of Chemistry journal article supplement (doi:10.1039/d0ra10120f), 2021-01-01
Supplement: d0ra10120f1.pdf [file d0ra10120f1.pdf]

Supporting material for

**Simultaneous amorphous silica and phosphorus recovery from rice husk poultry litter ash**

Laura Fiameni<sup>a</sup>, Ahmad Assi<sup>a</sup>, Ario Fahimi<sup>a</sup>, Bruno Valentim<sup>b</sup>, Karen Moreira<sup>b</sup>, Georgeta Predeanu<sup>c</sup>, Valerica Slăvescu<sup>c</sup>, Bogdan Ş. Vasile<sup>d</sup>, Adrian I. Nicoară<sup>d</sup>, Laura Borgese<sup>a</sup>, Gaia Boniardi<sup>e</sup>, Andrea Turolla<sup>e</sup>, Roberto Canziani<sup>e</sup> and Elza Bontempi<sup>a\*</sup>

- 
- a. *INSTM and Chemistry for Technologies Laboratory, Department of Mechanical and Industrial Engineering, University of Brescia, Via Branze, 38, 25123, Brescia, Italy.*
- b. *Instituto de Ciências da Terra (ICT), Faculdade de Ciências da Universidade do Porto, Rua do Campo Alegre 1021, 4169-007 Porto, Portugal.*
- c. *University POLITEHNICA of Bucharest, Research Center for Environmental Protection and Eco-Friendly Technologies (CPMTE), Bucharest, Romania.*
- d. *University POLITEHNICA of Bucharest, National Research Center for Micro and Nanomaterials, Bucharest, Romania.*
- e. *Politecnico di Milano, Department of Civil and Environmental Engineering (DICA) – Environmental Section, Piazza Leonardo da Vinci, 32, 20133, Milano, Italy.*

\* Corresponding author: elza.bontempi@unibs.it

**Figure S.1** Scheme of UV-Vis chemical method for phosphorus quantification.

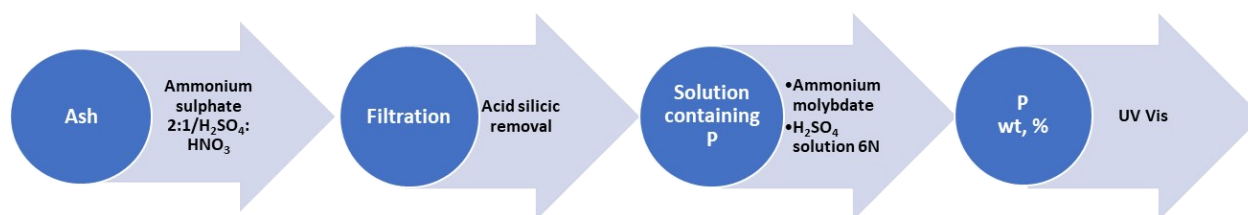

**Table S.2** Contaminants limit values in fertilizers and soil improvers [61].

| Contaminant                 | Concentration (mg/kg) dry matter |                                                                    |                                                                    |               |           |
|-----------------------------|----------------------------------|--------------------------------------------------------------------|--------------------------------------------------------------------|---------------|-----------|
|                             | Fertilizer                       |                                                                    |                                                                    | Soil improver |           |
|                             | Organic                          | Organo-mineral                                                     | Inorganic macronutrient                                            | Organic       | Inorganic |
|                             |                                  | 3 **                                                               | 3 **                                                               |               |           |
| Cadmium (Cd)                | 1,5                              | 60 mg/kg phosphorus pentoxide (P <sub>2</sub> O <sub>5</sub> ) *** | 60 mg/kg phosphorus pentoxide (P <sub>2</sub> O <sub>5</sub> ) *** | 2             | 1,5       |
| Hexavalent chromium (Cr VI) | 2                                | 2                                                                  | 2                                                                  | 2             | 2         |
| Mercury (Hg)                | 1                                | 1                                                                  | 1                                                                  | 1             | 1         |
| Nickel (Ni)                 | 50                               | 50                                                                 | 100                                                                | 50            | 100       |
| Lead (Pb)                   | 120                              | 120                                                                | 120                                                                | 120           | 120       |
| Inorganic arsenic (As)      | 40                               | 40                                                                 | 40                                                                 | 40            | 40        |
| Copper (Cu)                 | 300                              | 600*                                                               | 600*                                                               | 300           | 300       |
| Zinc (Zn)                   | 800                              | 1500*                                                              | 1500*                                                              | 800           | 800       |

\* These limit values shall not apply where copper (Cu) or zinc (Zn) has been intentionally added to an organo-mineral fertilizer or an inorganic macronutrient fertilizer for the purpose of correcting a soil micronutrient deficiency and is declared in accordance with Annex III.

\*\*Where an organo-mineral fertilizer or an inorganic macronutrient fertilizer has a total phosphorus (P) content of less than 5 % phosphorus pentoxide (P<sub>2</sub>O<sub>5</sub>)-equivalent by mass.

\*\*\* Where an organo-mineral fertilizer or an inorganic macronutrient fertilizer has a total phosphorus (P) content of 5 % phosphorus pentoxide (P<sub>2</sub>O<sub>5</sub>)-equivalent or more by mass ('phosphate fertilizer').

**Table S.3** TXRF results for acid leachate with HCl 1 mol L<sup>-1</sup> for the three RHPLA under examination.

| Element | BA              |             | ECO             |             | MCYC            |             |
|---------|-----------------|-------------|-----------------|-------------|-----------------|-------------|
|         | Average (mg/kg) | Uncertainty | Average (mg/kg) | Uncertainty | Average (mg/kg) | Uncertainty |
| P       | 57 448          | ± 2 470     | 75 486          | ± 2 892     | 73 188          | ± 10 309    |
| S       | 12 429          | ± 1 297     | 19 980          | ± 917       | 15 474          | ± 1 547     |
| Cl      | 109 233         | ± 6 930     | 162 913         | ± 10 345    | 156 533         | ± 37 957    |
| K       | 74 442          | ± 1 859     | 161 834         | ± 11 686    | 112 126         | ± 23 772    |
| Ca      | 53 775          | ± 2 223     | 42 653          | ± 1 897     | 52 394          | ± 7 315     |
| Ti      | 58              | ± 2         | nd              |             | 13              | ± 3         |
| V       | 19              | ± 4         | 10              | ± 8         | nd              |             |
| Cr      | 46              | ± 8         | 20              | ± 9         | 10              | ± 2         |
| Mn      | 1 507           | ± 47        | 2 280           | ± 74        | 2 507           | ± 378       |
| Fe      | 2 528           | ± 117       | 1 530           | ± 76        | 19              | ± 6         |
| Ni      | 18              | ± 2         | 26              | ± 2         | 44              | ± 9         |
| Cu      | 112             | ± 6         | 80              | ± 5         | 15.0            | ± 0.3       |
| Zn      | 721             | ± 29        | 2 455           | ± 87        | 1 946           | ± 360       |
| Br      | 11              | ± 9         | 45              | ± 1         | 67              | ± 14        |
| Rb      | 42              | ± 5         | 133             | ± 10        | 104             | ± 17        |
| Sr      | 95              | ± 7         | 124             | ± 14        | 193             | ± 28        |
| Ce      | nd              |             | nd              |             | 19              | ± 4         |
| Pb      | 5.1             | ± 1.5       | 1.9             | ± 0.6       | 0.9             | ± 1.6       |

nd: not detected, below LOD (limit of detection).
